# Supplementary material for: Structure dynamics of HIV-1 Env trimers on native virions engaged with living T cells
Source: PubMed Central journal article supplement (PMC8551276; doi:10.1038/s42003-021-02658-1), 2021-10-27
Supplement: 42003_2021_2658_MOESM2_ESM.pdf [file 42003_2021_2658_MOESM2_ESM.pdf]

**SUPPLEMENTARY INFORMATION**

**Structure dynamics of HIV-1 Env Trimers on Native  
virions Engaged with Living T Cells**

Irene Carlon-Andres<sup>1,2,3\*</sup>, Tomas Malinauskas<sup>3</sup>, Sergi Padilla-Parra<sup>1,2,3\*</sup>.

**Affiliations:**

<sup>1</sup>Department of Infectious Diseases, King's College London, Faculty of Life Sciences & Medicine, London SE1 9RT, UK

<sup>2</sup>Randall Division of Cell and Molecular Biophysics, King's College London, London SE1 9RT, UK.

<sup>3</sup>Division of Structural Biology, Wellcome Centre for Human Genetics, University of Oxford, Oxford OX3 7BN, UK

\*Lead Contact: [irene.carlon-andres@kcl.ac.uk](mailto:irene.carlon-andres@kcl.ac.uk), [sergio.padilla\\_parra@kcl.ac.uk](mailto:sergio.padilla_parra@kcl.ac.uk)

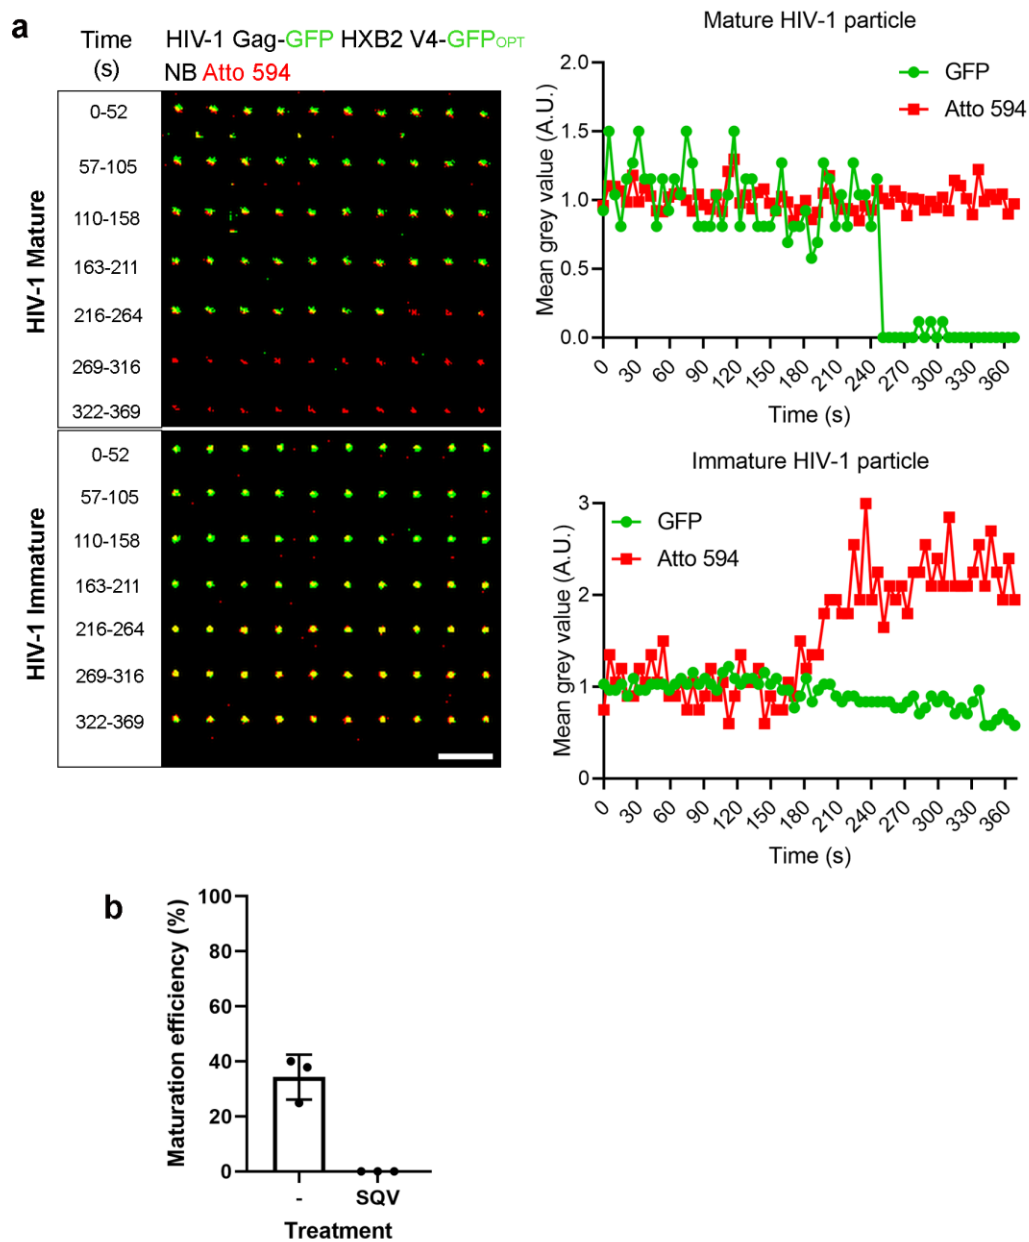

**Supplementary Figure 1. Labelling and maturation efficiency of HXB2 V4-GFP<sub>OPT</sub> virions.** **a** Single particle tracking of mature and immature virions upon saponin-induced membrane permeabilization. The micrograph shows a double labelled HIV-1 mature particle (GFP+ Atto 594+) releasing the GFP content at ~240 s after saponin addition, as observed by a drop in green fluorescence intensity. Membrane permeabilization in immature HIV-1 particles instead allows access to uncleaved Gag-GFP by NbA594, judged by an increase in red fluorescent intensity at ~200 s after saponin addition. Scale bar 5  $\mu$ m. A.U.: arbitrary units. **b** Bar graph showing the mean and SD of the relative number of mature and immature virions of n=3 viral samples prepared independently in absence (-) or presence of saquinavir (SQV) treatment. At least 100 viral particles were analyzed per condition, per experiment.

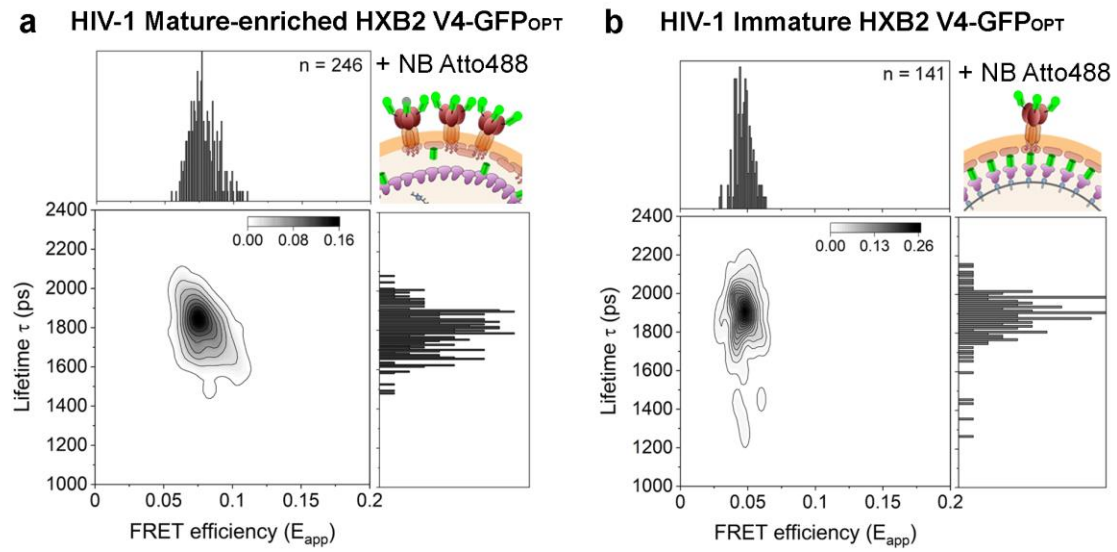

**Supplementary Figure 2. FRET negative controls for intramolecular and intermolecular HIV-1 Env conformations.** Two-dimensional (2D) kernel probability graphs showing FRET (FRET efficiency,  $E_{app}$ ) vs FLIM (Lifetime, in ps) data. **a** Mature-enriched or **b** Immature HXB2 V4-GFP<sub>OPT</sub> bearing Gag-GFP labelled with NbA488. Absence of acceptor delimits the no-FRET threshold of  $E_{app} = 0.1$  for mature-enriched viral sample and  $E_{app} = 0.07$  for immature particles.

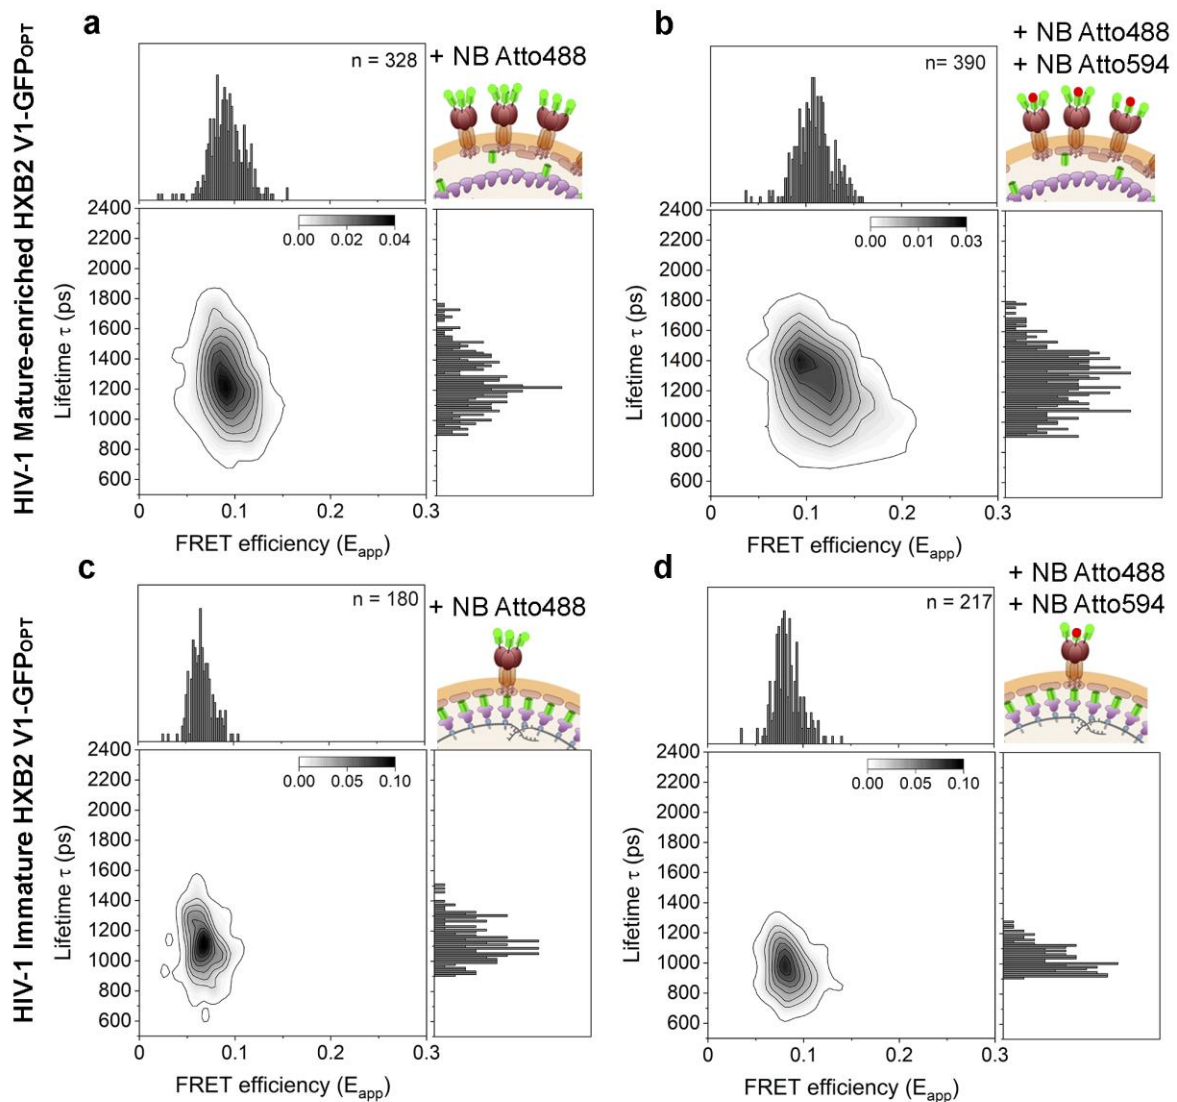

**Supplementary Figure 3. FRET negative controls for intramolecular and intermolecular HIV-1 Env conformations.** Two-dimensional (2D) kernel probability graphs showing FRET (FRET efficiency,  $E_{app}$ ) vs FLIM (Lifetime, in ps) data. **(a-b)** Mature-enriched sample of HXB2 V4-GFP<sub>OPT</sub> bearing Gag-GFP labelled with the donor, NbA488 **(a)** or double labelled, NbA488 and NbA594 **(b)**. **(c-d)** Immature sample of HXB2 V4-GFP<sub>OPT</sub> bearing Gag-GFP labelled with the donor, NbA488 **(c)** or double labelled, NbA488 and NbA594 **(d)**. Addition of the acceptor NbA594 in presence of the donor fluorophore NbA488 induces a shift towards higher FRET efficiencies in both, **(b)** mature and **(d)** immature particles below 0.23, which determines the threshold for intermolecular interactions observed in gp120 V4-labelled virions.

**a**

Viral sample: Mature-enriched    Immature  
 Env distribution: "Cluster"    "Sparse"

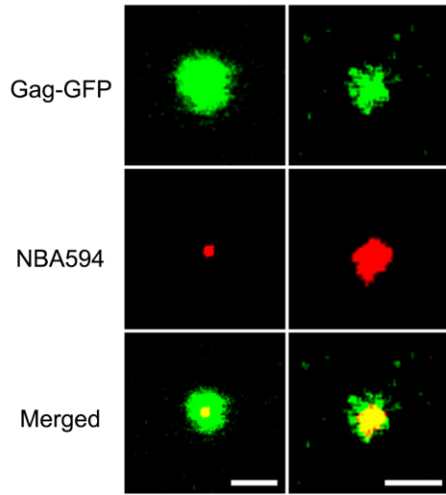**b**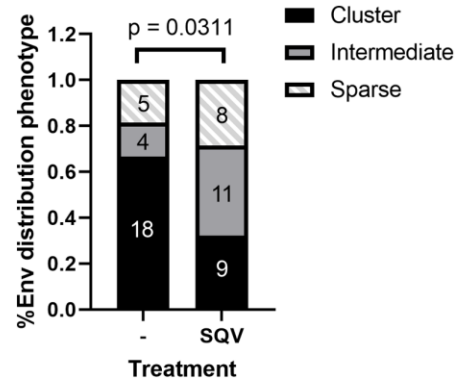

**Supplementary Figure 4. STED microscopy shows different HXB2-GFP<sub>OPT</sub>-Nb594 distribution patterns for mature and immature viruses.** **a** Representative STED images of Gag-GFP (green) and HXB2-GFP<sub>OPT</sub> labelled with NbA594 (red) for Env "cluster" phenotype predominantly found in mature-enriched samples and Env "sparse" distribution observed in immature HIV-1 particles. Scale bar: 500 nm. **b** Env distribution patterns were recovered by drawing a plot profile to recover the Env signal distribution around the virus particles. Three different patterns with different peaks and distributions were recovered. Particles were represented statistically in a bar diagram representing the occurrence of each phenotype for Env distribution (cluster, intermediate, sparse) and significance was assessed by  $\chi^2$  test. Absolute numbers of viral particles analyzed are indicated on the bars for each distribution pattern, per condition.

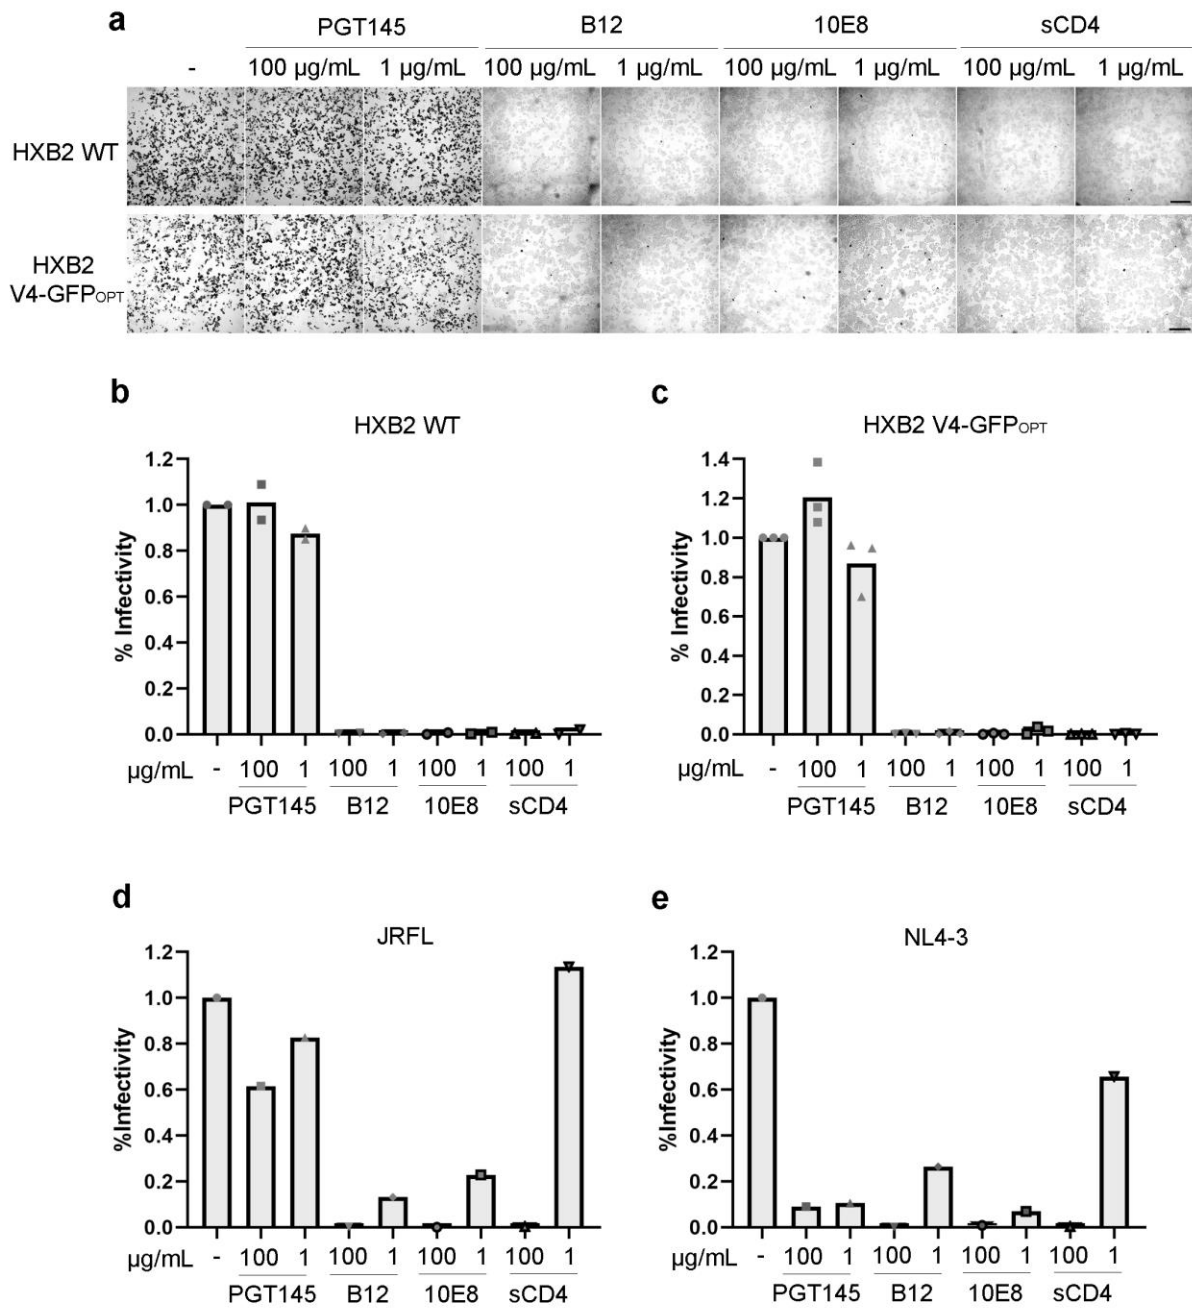

**Supplementary Figure 5. Neutralization efficiency of bNAbs on different HIV-1 strains.** TZM-bl cells were infected with equivalent amounts of pseudo-typed HIV-1 virus in absence (-) or presence of PGT145, b12, 10E8 antibodies or sCD4 (100  $\mu\text{g/mL}$  or 1  $\mu\text{g/mL}$ , as indicated). **a** Micrograph of transmission light microscopy showing infection efficiency of HXB2 WT pseudo-typed viruses (upper row) or HXB2 V4-GFP<sub>OPT</sub> (bottom row) in absence or presence of different ligands. Scale bar 0.5 mm. **(b-c)** Column graphs represent the mean and dots individual values showing the relative sensibility to antibody or receptor binding of **(b)** HXB2 WT pseudo-typed viruses (n=2 independent experiments) or **(c)** HXB2 V4-GFP<sub>OPT</sub> pseudo-typed viruses (n=3 independent experiments). **(d-e)** Column graphs represent the relative sensibility to antibody or receptor binding of **(d)** JRFL pseudo-typed viruses or **(e)** NL4-3 pseudo-typed viruses.
